# Supplementary material
Source: PubMed Central journal article supplement (PMC2169497)
Supplement: NIHMS35881-supplement-supplement.pdf [file NIHMS35881-supplement-supplement.pdf]

**Supp. Fig. 1. Total ion current chromatogram of peptides from native GAPDH digested with trypsin.** Purified rabbit muscle GAPDH was digested with trypsin and ESI-LC-MS was performed with a LCQ ion trap mass spectrometer (LCQ Deca, Thermo Finnigan, San Jose, CA).

**Supp. Fig. 2. A) MALDI-TOF analysis of the tryptic digest of OA-NO<sub>2</sub>-treated GAPDH peptide #23** (m/z 2214.10), shows the concomitant existence of both the non-modified (m/z 2214.10) and OA-NO<sub>2</sub>-modified peptide #23 (m/z 2541.53). **B) PSD MALDI-TOF analysis of modified peptide #23** ([M+H]<sup>+</sup> 2541.53) gives a principal product ion of m/z 437.7, corresponding to the immonium ion of the histidine-OA-NO<sub>2</sub> adduct.

**Supp. Fig. 3. MS/MS spectrum of the doubly-charged ion at m/z 462.06 corresponding to OA-NO<sub>2</sub>-adducted peptide #2.** Inset: Amino acid sequence indicating major C- and N- terminal fragment ion detected by full-scan MS/MS (LTQ, Thermo Electron, San Jose, CA). **Table. List of MS/MS fragment ions m/z from peptide #2. Ions that are detected are highlighted in color.**

**Supp. Fig. 4. MS/MS spectrum of triply-charged ion at m/z 478.02 corresponding to OA-NO<sub>2</sub>-adducted peptide #21,** labeling doubly-charged ions (LTQ, Thermo Electron, San Jose, CA). Inset: Amino acid sequence indicating major C- and N- terminal fragment ion detected by full-scan MS/MS. **Table. List of MS/MS fragment ions m/z from the OA-NO<sub>2</sub>-modified peptide #21. Ions that are detected are highlighted in color.**

**Supp. Fig. 5. MS/MS spectrum of the triply-charged ion at m/z 687.89 corresponding to OA-NO<sub>2</sub>-adducted peptide #19,** labeling doubly-charged ions (LTQ, Thermo Electron, San Jose, CA). Inset: Amino acid sequence indicating the major C- and N- terminal fragment ions detected by full-scan MS/MS. **Table. List of MS/MS fragment ions m/z from the OA-NO<sub>2</sub>-modified peptide #19. Ions that are detected are highlighted in color.**

**Supp. Table 1: GAPDH Tryptic Peptides Identified by LC-MS**

| Peak/<br>Pept. # | RT<br>(min)  | Sequence<br>Position | Sequence                                                                 | Molecular<br>Mass (MI, Da.) | z        | Theoretical<br>m/z | Measured<br>m/z | Control  | OA-NO <sub>2</sub><br>Treated |
|------------------|--------------|----------------------|--------------------------------------------------------------------------|-----------------------------|----------|--------------------|-----------------|----------|-------------------------------|
| 1                | 2.05         | 258-260              | VVK                                                                      | 344.25                      | 1        | 345.25             | 345.2           | X        | X                             |
| <b>2</b>         | <b>2.06</b>  | <b>105-110</b>       | <b>AGAH<sup>108</sup>LK</b>                                              | <b>595.35</b>               | <b>1</b> | <b>596.35</b>      | <b>596.3</b>    | <b>X</b> | <b>↓</b>                      |
| 3                | 2.5          | 184-191              | TVDGPSGK                                                                 | 759.38                      | 1        | 760.38             | 760.4           | X        | X                             |
| 4                | 2.62         | 53-58                | FHGTVK                                                                   | 687.38                      | 1        | 688.38             | 688.1           | X        | X                             |
| 5                | 2.85         | 14-17                | LVTR                                                                     | 487.32                      | 1        | 488.32             | 488.9           | X        | X                             |
| 6                | 3.17         | 18-24                | AAFNSGK                                                                  | 693.35                      | 1        | 694.35             | 694.7           | X        | X                             |
| 7                | 5.14         | 78-83                | DPANIK                                                                   | 656.36                      | 1        | 657.36             | 657.3           | X        | X                             |
| 8                | 5.3          | 252-256              | YDDIK                                                                    | 652.31                      | 1        | 653.31             | 653.2           | X        | X                             |
| 9                | 6.11         | 137-142              | YDNSLK                                                                   | 738.36                      | 1        | 739.36             | 739.3           | X        | X                             |
| 10               | 8.41         | 261-268              | QASEGPLK                                                                 | 828.44                      | 1        | 829.44             | 829.3           | X        | X                             |
| 11               | 10.7         | 59-63                | AENGK                                                                    | 517.26                      | 1        | 518.26             | 518.5           | X        | X                             |
| 12               | 10.76        | 192-194              | LWR                                                                      | 473.28                      | 1        | 474.28             | 474.2           | X        | X                             |
| 13               | 15.52        | 64-69                | LVINGK                                                                   | 642.41                      | 1        | 643.41             | 643.4           | X        | X                             |
| 14               | 20.46        | 3-10                 | VGVNGFGR                                                                 | 804.43                      | 1        | 805.43             | 805.5           | X        | X                             |
| 15               | 21.91        | 217-224              | VIPELNGK                                                                 | 868.51                      | 1        | 869.51             | 869.4           | X        | X                             |
| 16               | 23.11        | 225-231              | LTGMAFR                                                                  | 794.42                      | 1        | 795.42             | 795.5           | X        | X                             |
| 17               | 23.19        | 198-212              | GAAQNIPASTGAAK                                                           | 1368.74                     | 1        | 1369.74            | 1369.7          | X        | X                             |
| <b>18</b>        | <b>27.86</b> | <b>321-331</b>       | <b>VVDLMVH<sup>327</sup>MASK</b>                                         | <b>1228.64</b>              | <b>1</b> | <b>1229.64</b>     | <b>1229.5</b>   | <b>X</b> | <b>↓</b>                      |
| <b>19</b>        | <b>28.02</b> | <b>143-159</b>       | <b>IVSNASC<sup>149</sup>TTNC<sup>153</sup>LAPLAK</b>                     | <b>1704.86</b>              | <b>1</b> | <b>1705.86</b>     | <b>1703.8</b>   | <b>X</b> | <b>↓↓↓</b>                    |
| 20               | 28.1         | 70-77                | AITIFQER                                                                 | 976.54                      | 1        | 977.54             | 977.5           | X        | X                             |
| <b>21</b>        | <b>36.36</b> | <b>232-245</b>       | <b>VPTPNVSVVDLTC<sup>244</sup>R</b>                                      | <b>1498.79</b>              | <b>1</b> | <b>1499.79</b>     | <b>1499.7</b>   | <b>X</b> | <b>↓↓↓</b>                    |
| 22               | 37.23        | 307-320              | LISWYDNEFGYSNR                                                           | 1762.8                      | 1        | 1763.8             | 1763.7          | X        | X                             |
| <b>23</b>        | <b>39.39</b> | <b>116-136</b>       | <b>VIISAPSADAPMFVMGVNH<sup>134</sup>EK</b>                               | <b>2212.11</b>              | <b>2</b> | <b>1107.05</b>     | <b>1107.1</b>   | <b>X</b> | <b>↓</b>                      |
| 24               | 50           | 160-183              | VIH <sup>162</sup> DH <sup>164</sup> FGIVEGLMTTVH <sup>176</sup> AITATQK | 2617.38                     | 2        | 1309.69            | 1309.7          | X        | X                             |
| 25               | 61.26        | 25-52                | VDVVAINDPFIDLH <sup>38</sup> YMVYMFQYDSTH <sup>50</sup> GK               | 3316.57                     | 3        | 1106.52            | 1106.5          | X        | X                             |

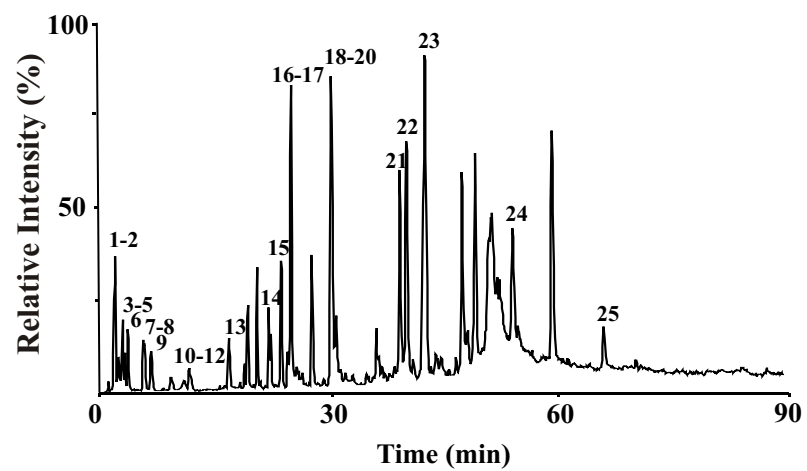

**Supp. Fig. 1**  
**Batthyany *et al.***

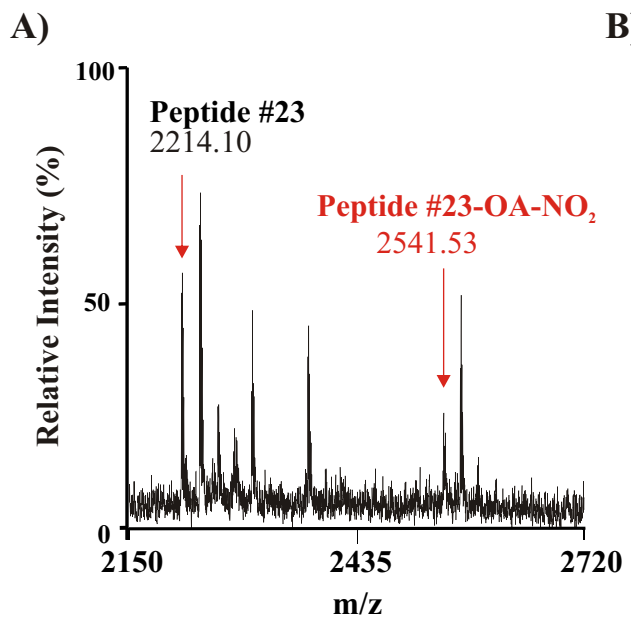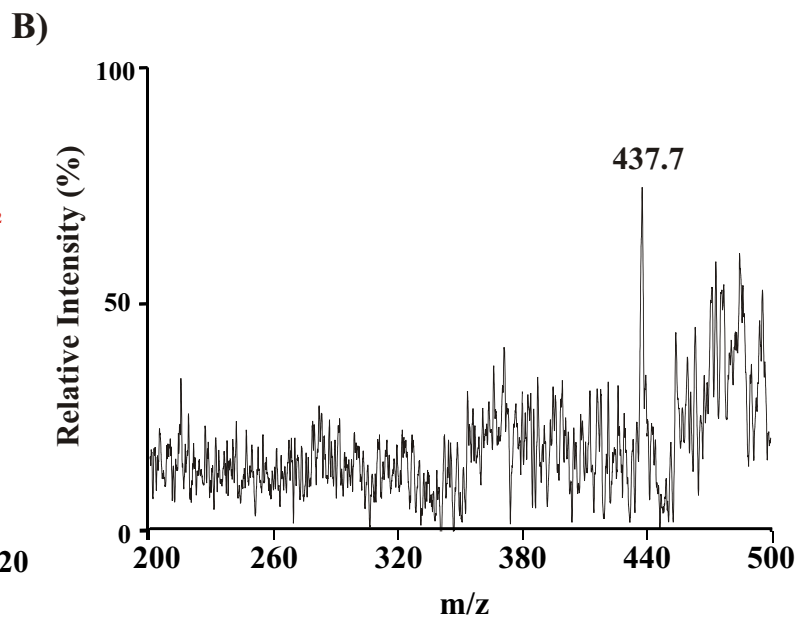

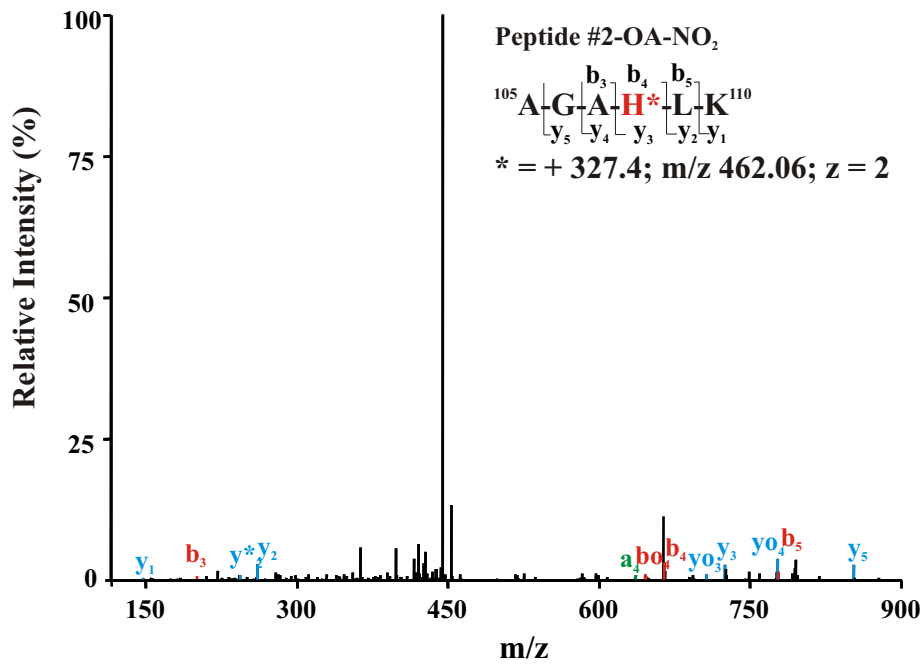

**Table. MS-MS data of OA-NO<sub>2</sub>-modified peptide #2**

|   | AA | a      | b      | y      |   |
|---|----|--------|--------|--------|---|
| 1 | A  | 44.05  | 72.04  | -      | 6 |
| 2 | G  | 101.07 | 129.07 | 852.71 | 5 |
| 3 | A  | 172.11 | 200.10 | 795.69 | 4 |
| 4 | H* | 636.57 | 664.56 | 724.66 | 3 |
| 5 | L  | 749.65 | 777.65 | 260.20 | 2 |
| 6 | K  | -      | -      | 147.11 | 1 |

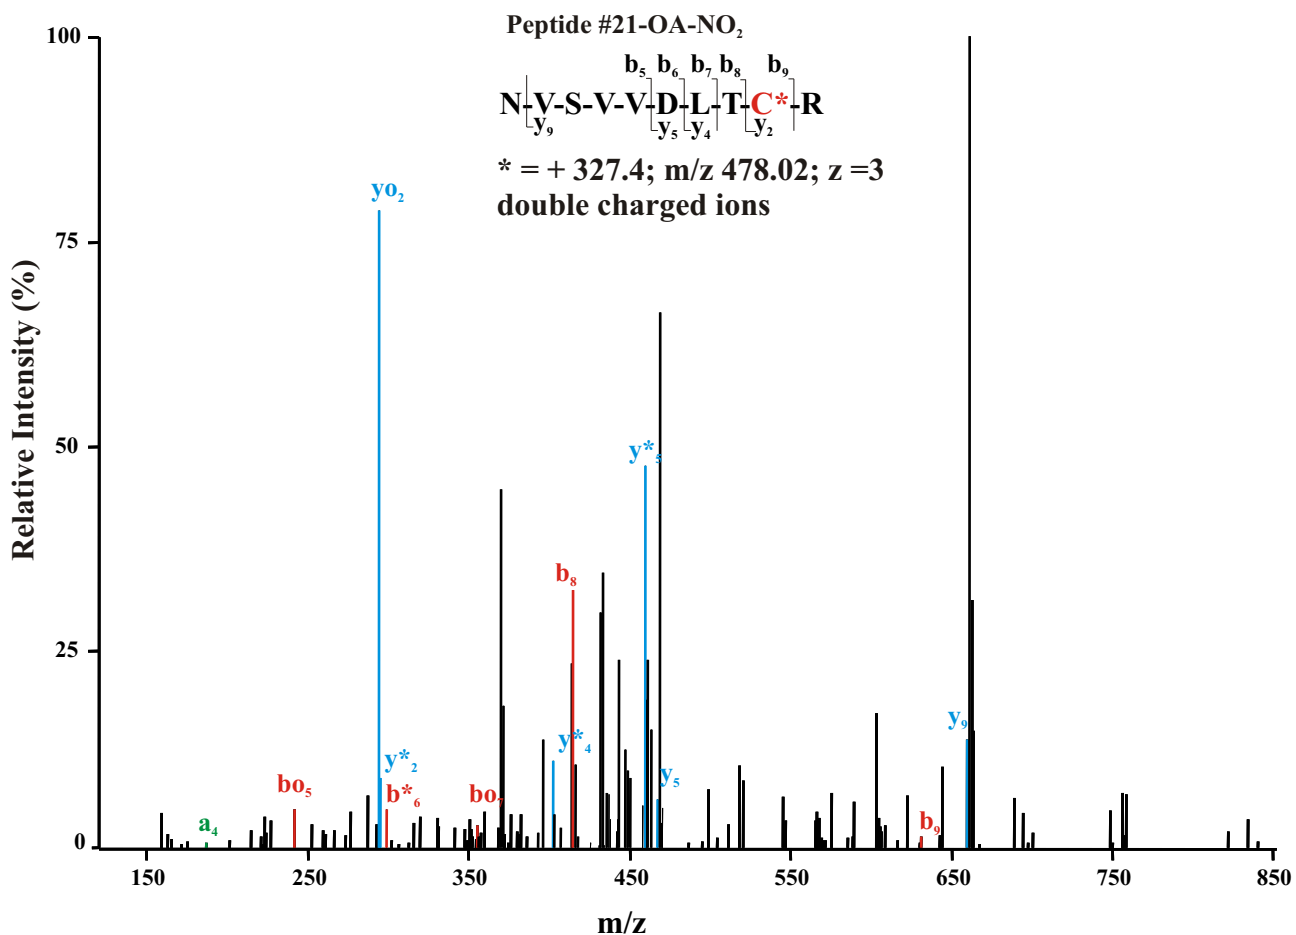

**Table.** *MS-MS data of OA-NO<sub>2</sub>-modified peptide #21*

|    | AA | a      | b      | b*     | y      | y*     |    |
|----|----|--------|--------|--------|--------|--------|----|
| 1  | N  | 44.03  | 58.03  | 49.52  | -      | -      | 10 |
| 2  | V  | 93.57  | 107.56 | 99.05  | 659.97 | 651.45 | 9  |
| 3  | S  | 137.08 | 151.08 | 142.57 | 610.43 | 601.92 | 8  |
| 4  | V  | 186.62 | 200.61 | 192.10 | 566.92 | 558.40 | 7  |
| 5  | V  | 236.15 | 250.15 | 241.63 | 517.38 | 508.87 | 6  |
| 6  | D  | 293.66 | 307.66 | 299.15 | 467.85 | 459.33 | 5  |
| 7  | L  | 350.21 | 364.20 | 355.69 | 410.33 | 401.82 | 4  |
| 8  | T  | 400.73 | 414.73 | 406.21 | 353.79 | 345.28 | 3  |
| 9  | C* | 615.93 | 629.93 | 621.42 | 303.27 | 294.75 | 2  |
| 10 | R  | -      | -      | -      | 88.06  | 79.55  | 1  |

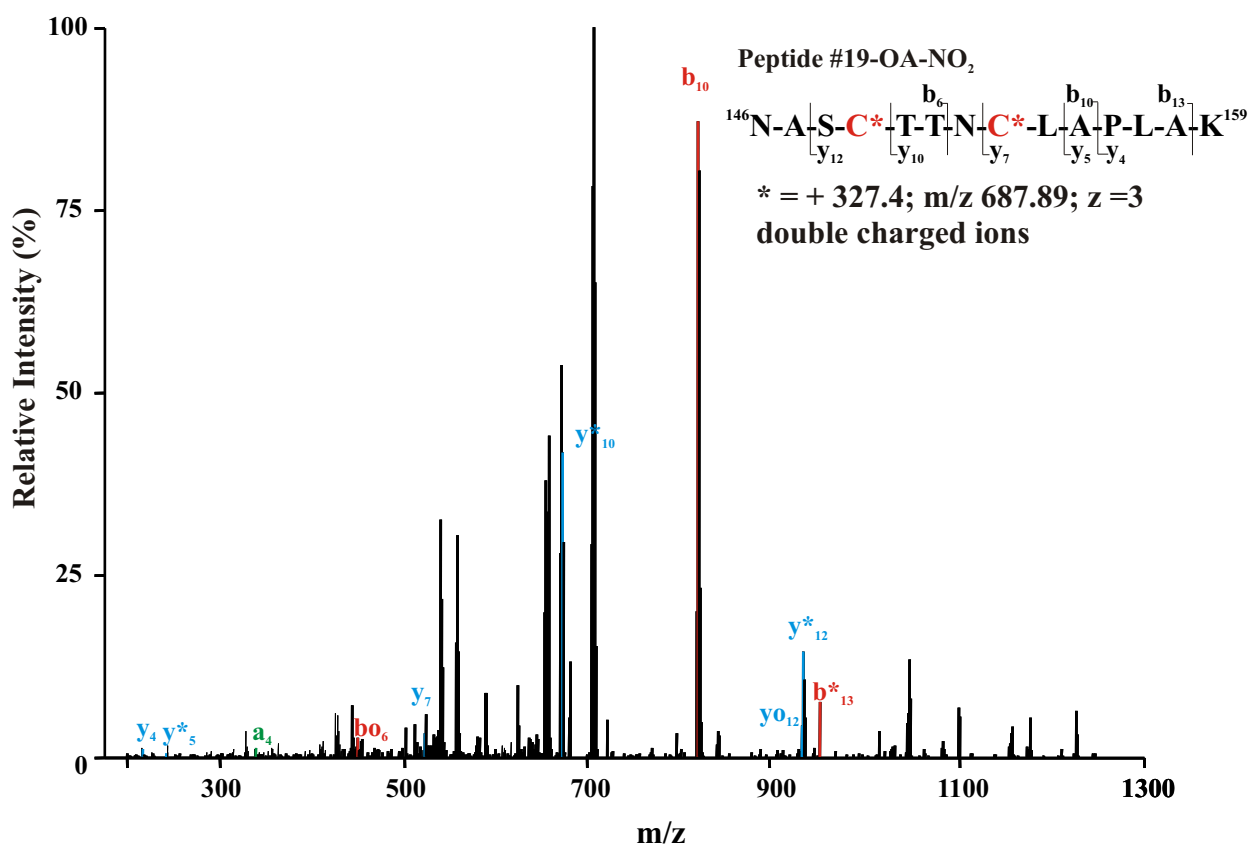

**Table. MS-MS data of OA-NO<sub>2</sub>-modified peptide #19**

|    | AA | a      | b      | b*     | y      | y*     |    |
|----|----|--------|--------|--------|--------|--------|----|
| 1  | N  | 44.03  | 58.03  | 49.52  | -      | -      | 14 |
| 2  | A  | 79.55  | 93.55  | 85.03  | 974.22 | 965.71 | 13 |
| 3  | S  | 123.07 | 137.06 | 128.55 | 938.70 | 930.19 | 12 |
| 4  | C* | 338.27 | 352.27 | 343.75 | 895.19 | 886.67 | 11 |
| 5  | T  | 388.79 | 402.79 | 394.28 | 679.98 | 671.47 | 10 |
| 6  | T  | 439.32 | 453.32 | 444.80 | 629.46 | 620.94 | 9  |
| 7  | N  | 496.34 | 510.34 | 501.33 | 578.93 | 570.42 | 8  |
| 8  | C* | 711.54 | 725.54 | 716.54 | 521.91 | 513.40 | 7  |
| 9  | L  | 768.09 | 782.08 | 773.08 | 306.71 | 298.19 | 6  |
| 10 | A  | 803.60 | 817.60 | 808.60 | 250.17 | 241.65 | 5  |
| 11 | P  | 852.13 | 866.13 | 857.12 | 214.65 | 206.13 | 4  |
| 12 | L  | 908.67 | 922.67 | 913.67 | 166.12 | 157.61 | 3  |
| 13 | A  | 944.19 | 958.19 | 949.18 | 109.58 | 101.07 | 2  |
| 14 | K  | -      | -      | -      | 74.06  | 65.55  | 1  |
